# Supplementary material for: Discovery of a Potent Candidate for RET-Specific Non-Small-Cell Lung Cancer—A Combined In Silico and In Vitro Strategy
Source: MDPI journal article supplement (doi:10.3390/pharmaceutics13111775), 2021-10-24
Supplement: s1 [file s1]

# Supplementary Materials: Discovery of a Potent Candidate for RET-Specific Non-Small-Cell Lung Cancer—A Combined in Silico and In Vitro Strategy

Priyanka Ramesh, Woong-Hee Shin and Shanthi Veerappapillai

**Table S1.** List of existing RET inhibitors retrieved from literature.

| S. No | Compounds Name | PubChem ID | Active / Inactive | IC <sub>50</sub> (μM) |
|-------|----------------|------------|-------------------|-----------------------|
| 1     | Pralsetinib    | 129073603  | Active            | 0.4                   |
| 2     | Lenvatinib     | 9823820    | Active            | 1.5                   |
| 3     | RXDX-105       | 56846693   | Active            | 3                     |
| 4     | Vandetanib     | 3081361    | Active            | 4                     |
| 5     | Crizotinib     | 11626560   | Active            | 5                     |
| 6     | Sunitinib      | 5329102    | Active            | 6.6                   |
| 7     | Sorafenib      | 216239     | Inactive          | 7.3                   |
| 8     | Regorafenib    | 11167602   | Inactive          | 8.8                   |
| 9     | AD80           | 71578106   | Inactive          | 9                     |
| 10    | Cabozantinib   | 25102847   | Inactive          | 11                    |
| 11    | Apatinib       | 11315474   | Inactive          | 13                    |
| 12    | Ponatinib      | 24826799   | Inactive          | 25.8                  |

**Table S2.** Rescoring and structure similarity analysis of screened compounds obtained using pharmacophore based strategy.

| S. No     | Compounds ID | RF Score | Tanimoto Coefficient (Tc) | S. No | Compounds ID | RF Score | Tanimoto Coefficient (Tc) |
|-----------|--------------|----------|---------------------------|-------|--------------|----------|---------------------------|
| Reference | Pralsetinib  | 5.962    | 1                         | 13    | DB01645      | 7.098    | 0.285                     |
| 1         | DB00179      | 6.097    | 0.139                     | 14    | DB01852      | 7.085    | 0.337                     |
| 2         | DB00242      | 7.098    | 0.431                     | 15    | DB02103      | 7.098    | 0.417                     |
| 3         | DB00317      | 5.959    | 0.385                     | 16    | DB02224      | 7.06     | 0.375                     |
| 4         | DB00905      | 6.032    | 0.239                     | 17    | DB02282      | 6.048    | 0.436                     |
| 5         | DB01094      | 7.065    | 0.327                     | 18    | DB02359      | 6.165    | 0.449                     |
| 6         | DB01102      | 6.113    | 0.189                     | 19    | DB02375      | 7.08     | 0.349                     |
| 7         | DB01148      | 7.108    | 0.414                     | 20    | DB02537      | 6.179    | 0.306                     |
| 8         | DB01193      | 6.246    | 0.294                     | 21    | DB02550      | 6.005    | 0.487                     |
| 9         | DB01250      | 6.19     | 0.173                     | 22    | DB02754      | 6.219    | 0.445                     |
| 10        | DB01438      | 5.977    | 0.157                     | 23    | DB02915      | 6.588    | 0.336                     |
| 11        | DB01558      | 6.048    | 0.363                     | 24    | DB02933      | 6.084    | 0.429                     |
| 12        | DB01594      | 6.006    | 0.413                     | 25    | DB02947      | 6.207    | 0.428                     |
| 26        | DB02984      | 5.958    | 0.334                     | 42    | DB03980      | 6.664    | 0.376                     |
| 27        | DB03037      | 6.044    | 0.307                     | 43    | DB04054      | 5.984    | 0.472                     |
| 28        | DB03097      | 5.976    | 0.347                     | 44    | DB04101      | 6.01     | 0.293                     |
| 29        | DB03267      | 6.253    | 0.462                     | 45    | DB04196      | 5.964    | 0.343                     |
| 30        | DB03312      | 5.959    | 0.385                     | 46    | DB04216      | 7.102    | 0.348                     |
| 31        | DB03365      | 6.049    | 0.322                     | 47    | DB04244      | 5.945    | 0.378                     |
| 32        | DB03467      | 7.065    | 0.295                     | 48    | DB04254      | 5.994    | 0.475                     |
| 33        | DB03496      | 7.108    | 0.48                      | 49    | DB04274      | 7.09     | 0.285                     |
| 34        | DB03716      | 6.075    | 0.424                     | 50    | DB04338      | 7.005    | 0.401                     |
| 35        | DB03804      | 5.952    | 0.426                     | 51    | DB04357      | 5.966    | 0.343                     |
| 36        | DB03809      | 6.164    | 0.43                      | 52    | DB04407      | 5.988    | 0.339                     |
| 37        | DB03878      | 6.043    | 0.363                     | 53    | DB04437      | 5.974    | 0.273                     |
| 38        | DB03881      | 7.084    | 0.475                     | 54    | DB04442      | 6.198    | 0.293                     |
| 39        | DB03899      | 6.273    | 0.422                     | 55    | DB04463      | 7.098    | 0.402                     |
| 40        | DB03916      | 6.947    | 0.345                     | 56    | DB04604      | 6.049    | 0.45                      |

|     |         |       |       |     |         |       |       |
|-----|---------|-------|-------|-----|---------|-------|-------|
| 41  | DB03921 | 6.571 | 0.318 | 57  | DB04751 | 6.955 | 0.432 |
| 58  | DB04764 | 6.48  | 0.332 | 74  | DB07065 | 6.036 | 0.464 |
| 59  | DB04806 | 6.025 | 0.401 | 75  | DB07066 | 7.098 | 0.433 |
| 60  | DB04809 | 6.506 | 0.226 | 76  | DB07101 | 6.366 | 0.322 |
| 61  | DB04816 | 5.953 | 0.226 | 77  | DB07107 | 6.629 | 0.327 |
| 62  | DB06061 | 6.571 | 0.432 | 78  | DB07119 | 5.992 | 0.141 |
| 63  | DB06190 | 7.098 | 0.262 | 79  | DB07126 | 7.01  | 0.368 |
| 64  | DB06485 | 6.793 | 0.32  | 80  | DB07146 | 5.987 | 0.434 |
| 65  | DB06609 | 7.098 | 0.343 | 81  | DB07163 | 5.95  | 0.433 |
| 66  | DB06649 | 6.859 | 0.183 | 82  | DB07170 | 6.588 | 0.401 |
| 67  | DB06814 | 6.354 | 0.231 | 83  | DB07173 | 6.149 | 0.445 |
| 68  | DB06837 | 5.957 | 0.412 | 84  | DB07175 | 6.326 | 0.332 |
| 69  | DB06852 | 6.589 | 0.432 | 85  | DB07194 | 5.974 | 0.418 |
| 70  | DB06999 | 6.003 | 0.424 | 86  | DB07202 | 6.706 | 0.425 |
| 71  | DB07000 | 6.124 | 0.435 | 87  | DB07248 | 6.268 | 0.413 |
| 72  | DB07024 | 7.082 | 0.485 | 88  | DB07250 | 6.507 | 0.357 |
| 73  | DB07054 | 6.665 | 0.331 | 89  | DB07252 | 6.584 | 0.379 |
| 90  | DB07266 | 6.004 | 0.516 | 106 | DB07602 | 6.046 | 0.339 |
| 91  | DB07268 | 6.253 | 0.292 | 107 | DB07606 | 7.099 | 0.502 |
| 92  | DB07303 | 6.001 | 0.272 | 108 | DB07618 | 6.045 | 0.51  |
| 93  | DB07335 | 7.098 | 0.401 | 109 | DB07648 | 6.105 | 0.402 |
| 94  | DB07352 | 7.085 | 0.29  | 110 | DB07653 | 5.952 | 0.452 |
| 95  | DB07382 | 6.071 | 0.4   | 111 | DB07655 | 6.148 | 0.389 |
| 96  | DB07410 | 6.086 | 0.326 | 112 | DB07662 | 6.117 | 0.314 |
| 97  | DB07474 | 6.038 | 0.447 | 113 | DB07686 | 7.096 | 0.379 |
| 98  | DB07481 | 6.932 | 0.343 | 114 | DB07698 | 6.097 | 0.371 |
| 99  | DB07488 | 5.999 | 0.349 | 115 | DB07715 | 5.959 | 0.261 |
| 100 | DB07489 | 6.282 | 0.353 | 116 | DB07750 | 6.286 | 0.304 |
| 101 | DB07495 | 6.577 | 0.435 | 117 | DB07751 | 6.018 | 0.286 |
| 102 | DB07504 | 6.014 | 0.294 | 118 | DB07761 | 6.536 | 0.286 |
| 103 | DB07525 | 6.98  | 0.237 | 119 | DB07766 | 5.961 | 0.459 |
| 104 | DB07545 | 6.166 | 0.32  | 120 | DB07791 | 6.319 | 0.403 |
| 105 | DB07546 | 6.1   | 0.447 | 121 | DB07795 | 7.095 | 0.325 |
| 122 | DB07809 | 6.213 | 0.262 | 138 | DB08150 | 6.223 | 0.357 |
| 123 | DB07832 | 6.095 | 0.346 | 139 | DB08178 | 7.025 | 0.345 |
| 124 | DB07877 | 6.024 | 0.462 | 140 | DB08182 | 6.974 | 0.362 |
| 125 | DB07926 | 6.01  | 0.31  | 141 | DB08208 | 5.97  | 0.302 |
| 126 | DB07942 | 7.093 | 0.24  | 142 | DB08218 | 6.342 | 0.342 |
| 127 | DB07981 | 6.054 | 0.484 | 143 | DB08230 | 7.095 | 0.309 |
| 128 | DB07984 | 6.149 | 0.484 | 144 | DB08241 | 6.935 | 0.37  |
| 129 | DB08004 | 6.017 | 0.393 | 145 | DB08267 | 6.569 | 0.372 |
| 130 | DB08026 | 6.584 | 0.351 | 146 | DB08313 | 6.161 | 0.309 |
| 131 | DB08052 | 7.098 | 0.451 | 147 | DB08314 | 7.098 | 0.229 |
| 132 | DB08053 | 7.098 | 0.443 | 148 | DB08325 | 6.955 | 0.397 |
| 133 | DB08067 | 6.348 | 0.365 | 149 | DB08350 | 6.156 | 0.382 |
| 134 | DB08073 | 5.991 | 0.393 | 150 | DB08392 | 5.967 | 0.452 |
| 135 | DB08112 | 6.143 | 0.321 | 151 | DB08393 | 5.952 | 0.445 |
| 136 | DB08130 | 6.048 | 0.377 | 152 | DB08395 | 5.992 | 0.477 |
| 137 | DB08136 | 6.937 | 0.282 | 153 | DB08436 | 6.272 | 0.453 |
| 154 | DB08442 | 6.226 | 0.345 | 170 | DB08860 | 6.597 | 0.447 |
| 155 | DB08462 | 6.273 | 0.3   | 171 | DB08893 | 6.161 | 0.26  |
| 156 | DB08466 | 6.579 | 0.1   | 172 | DB08907 | 6.804 | 0.402 |
| 157 | DB08470 | 6.975 | 0.153 | 173 | DB08916 | 5.959 | 0.434 |
| 158 | DB08517 | 7.065 | 0.3   | 174 | DB08974 | 6.146 | 0.26  |
| 159 | DB08527 | 5.964 | 0.412 | 175 | DB09330 | 6.549 | 0.448 |
| 160 | DB08539 | 6.108 | 0.45  | 176 | DB11259 | 7.09  | 0.321 |
| 161 | DB08557 | 6.882 | 0.493 | 177 | DB11336 | 7.008 | 0.262 |
| 162 | DB08564 | 6.208 | 0.331 | 178 | DB11656 | 6.992 | 0.366 |
| 163 | DB08568 | 5.993 | 0.335 | 179 | DB11665 | 5.98  | 0.48  |
| 164 | DB08569 | 5.982 | 0.341 | 180 | DB11865 | 7.069 | 0.488 |

|     |         |       |       |     |         |       |       |
|-----|---------|-------|-------|-----|---------|-------|-------|
| 165 | DB08572 | 6.061 | 0.357 | 181 | DB11919 | 7.01  | 0.256 |
| 166 | DB08583 | 6.235 | 0.423 | 182 | DB11958 | 6.997 | 0.475 |
| 167 | DB08673 | 6.18  | 0.234 | 183 | DB11967 | 7.098 | 0.422 |
| 168 | DB08694 | 6.156 | 0.458 | 184 | DB11982 | 6.644 | 0.436 |
| 169 | DB08787 | 7.098 | 0.301 | 185 | DB12039 | 6.532 | 0.315 |
| 186 | DB12174 | 5.977 | 0.372 | 198 | DB12937 | 7.087 | 0.383 |
| 187 | DB12183 | 6.311 | 0.417 | 199 | DB12941 | 7.098 | 0.384 |
| 188 | DB12218 | 6.005 | 0.43  | 200 | DB12966 | 5.956 | 0.363 |
| 189 | DB12387 | 6.997 | 0.543 | 201 | DB12974 | 6.128 | 0.376 |
| 190 | DB12433 | 6.084 | 0.375 | 202 | DB13059 | 6.077 | 0.479 |
| 191 | DB12566 | 6.961 | 0.387 | 203 | DB13074 | 6.078 | 0.379 |
| 192 | DB12611 | 6.312 | 0.513 | 204 | DB13174 | 5.991 | 0.275 |
| 193 | DB12672 | 6.986 | 0.435 | 205 | DB13203 | 6.066 | 0.448 |
| 194 | DB12687 | 6.536 | 0.407 | 206 | DB13837 | 5.964 | 0.4   |
| 195 | DB12746 | 6.496 | 0.298 | 207 | DB13983 | 7.085 | 0.384 |
| 196 | DB12848 | 5.978 | 0.405 | 208 | DB14008 | 7.085 | 0.332 |
| 197 | DB12927 | 6.414 | 0.409 |     |         |       |       |

**Table S3.** Rescoring and structure similarity analysis of screened compounds obtained using e-pharmacophore based strategy.

| S. No     | Compounds ID | RF Score | Tanimoto Coefficient (Tc) | S. No | Compounds ID | RF Score | Tanimoto Coefficient (Tc) |
|-----------|--------------|----------|---------------------------|-------|--------------|----------|---------------------------|
| Reference | Pralsetinib  | 5.962    | 1                         | 13    | DB06190      | 7.098    | 0.345                     |
| 1         | DB00179      | 6.097    | 0.139                     | 14    | DB06852      | 6.589    | 0.376                     |
| 2         | DB01102      | 6.113    | 0.189                     | 15    | DB07101      | 6.366    | 0.302                     |
| 3         | DB02282      | 6.048    | 0.238                     | 16    | DB07107      | 6.629    | 0.401                     |
| 4         | DB02550      | 6.005    | 0.344                     | 17    | DB07126      | 7.01     | 0.339                     |
| 5         | DB02933      | 6.084    | 0.436                     | 18    | DB07175      | 6.326    | 0.376                     |
| 6         | DB03365      | 6.049    | 0.487                     | 19    | DB07194      | 5.974    | 0.432                     |
| 7         | DB03496      | 7.108    | 0.387                     | 20    | DB07248      | 6.268    | 0.363                     |
| 8         | DB03916      | 6.947    | 0.429                     | 21    | DB07252      | 6.584    | 0.262                     |
| 9         | DB03980      | 6.664    | 0.396                     | 22    | DB07268      | 6.253    | 0.445                     |
| 10        | DB04338      | 7.005    | 0.472                     | 23    | DB07303      | 6.001    | 0.432                     |
| 11        | DB04407      | 5.988    | 0.322                     | 24    | DB07382      | 6.071    | 0.337                     |
| 12        | DB04751      | 6.955    | 0.48                      | 25    | DB07474      | 6.038    | 0.393                     |
| 26        | DB07489      | 6.282    | 0.322                     | 42    | DB08350      | 6.156    | 0.447                     |
| 27        | DB07504      | 6.014    | 0.327                     | 43    | DB08568      | 5.993    | 0.353                     |
| 28        | DB07545      | 6.166    | 0.368                     | 44    | DB08569      | 5.982    | 0.294                     |
| 29        | DB07606      | 7.099    | 0.462                     | 45    | DB08583      | 6.235    | 0.274                     |
| 30        | DB07686      | 7.096    | 0.332                     | 46    | DB08860      | 6.597    | 0.32                      |
| 31        | DB07698      | 6.097    | 0.418                     | 47    | DB09330      | 6.549    | 0.502                     |
| 32        | DB07791      | 6.319    | 0.394                     | 48    | DB11665      | 5.98     | 0.426                     |
| 33        | DB07981      | 6.054    | 0.246                     | 49    | DB11958      | 6.997    | 0.379                     |
| 34        | DB08004      | 6.017    | 0.338                     | 50    | DB11967      | 7.098    | 0.371                     |
| 35        | DB08026      | 6.584    | 0.413                     | 51    | DB11982      | 6.644    | 0.304                     |
| 36        | DB08052      | 7.098    | 0.379                     | 52    | DB12218      | 6.005    | 0.403                     |
| 37        | DB08182      | 6.974    | 0.292                     | 53    | DB12387      | 6.997    | 0.387                     |
| 38        | DB08208      | 5.97     | 0.272                     | 54    | DB12672      | 6.986    | 0.389                     |
| 39        | DB08241      | 6.935    | 0.404                     | 55    | DB12848      | 5.978    | 0.401                     |
| 40        | DB08267      | 6.569    | 0.441                     | 56    | DB12941      | 7.098    | 0.484                     |
| 41        | DB08325      | 6.955    | 0.4                       | 57    | DB01182      | 6.174    | 0.39                      |
| 58        | DB02197      | 6.15     | 0.258                     | 74    | DB08532      | 7.098    | 0.36                      |
| 59        | DB03072      | 6.103    | 0.393                     | 75    | DB08613      | 6.744    | 0.382                     |
| 60        | DB04588      | 7.085    | 0.351                     | 76    | DB09199      | 6.48     | 0.337                     |
| 61        | DB05575      | 6.027    | 0.451                     | 77    | DB09292      | 5.952    | 0.309                     |
| 62        | DB06589      | 5.972    | 0.416                     | 78    | DB11832      | 6.865    | 0.353                     |
| 63        | DB06967      | 6.065    | 0.362                     | 79    | DB12432      | 5.969    | 0.332                     |
| 64        | DB07245      | 6.203    | 0.302                     | 80    | DB12535      | 6.358    | 0.335                     |
| 65        | DB07247      | 6.018    | 0.37                      | 81    | DB02830      | 6.5      | 0.341                     |

|    |         |       |       |     |         |       |       |
|----|---------|-------|-------|-----|---------|-------|-------|
| 66 | DB07649 | 6.867 | 0.375 | 82  | DB03137 | 5.994 | 0.423 |
| 67 | DB07755 | 6.963 | 0.372 | 83  | DB03984 | 6.029 | 0.456 |
| 68 | DB07853 | 6.568 | 0.368 | 84  | DB06925 | 6.079 | 0.447 |
| 69 | DB07889 | 6.302 | 0.397 | 85  | DB07149 | 6.218 | 0.291 |
| 70 | DB07993 | 6.508 | 0.526 | 86  | DB07235 | 7.098 | 0.259 |
| 71 | DB08248 | 7.01  | 0.382 | 87  | DB07333 | 6.028 | 0.448 |
| 72 | DB08356 | 5.951 | 0.309 | 88  | DB07379 | 6.962 | 0.359 |
| 73 | DB08459 | 6.187 | 0.375 | 89  | DB07512 | 7.098 | 0.48  |
| 90 | DB07812 | 6.08  | 0.324 | 97  | DB08513 | 6.035 | 0.543 |
| 91 | DB07991 | 6.021 | 0.453 | 98  | DB08514 | 6.229 | 0.351 |
| 92 | DB08054 | 5.992 | 0.419 | 99  | DB08537 | 6.149 | 0.434 |
| 93 | DB08300 | 7.062 | 0.475 | 100 | DB11645 | 6.126 | 0.435 |
| 94 | DB08349 | 6.144 | 0.422 | 101 | DB11764 | 6.951 | 0.405 |
| 95 | DB08457 | 6.072 | 0.436 | 102 | DB11798 | 6.114 | 0.384 |
| 96 | DB08460 | 6.165 | 0.43  | 103 | DB13083 | 6.065 | 0.385 |

**Table S4.** Rescoring and structure similarity analysis of screened compounds obtained using receptor cavity based strategy.

| S. No     | Compounds ID | RF Score | Tanimoto Coefficient (Tc) | S. No | Compounds ID | RF Score | Tanimoto Coefficient (Tc) |
|-----------|--------------|----------|---------------------------|-------|--------------|----------|---------------------------|
| Reference | Pralsetinib  | 5.962    | 1                         | 14    | DB01645      | 7.098    | 0.285                     |
| 1         | DB00179      | 6.097    | 0.139                     | 15    | DB01852      | 7.085    | 0.337                     |
| 2         | DB00242      | 7.098    | 0.431                     | 16    | DB02103      | 7.098    | 0.417                     |
| 3         | DB00299      | 7.098    | 0.314                     | 17    | DB02197      | 6.15     | 0.344                     |
| 4         | DB00495      | 5.979    | 0.382                     | 18    | DB02224      | 7.06     | 0.375                     |
| 5         | DB00800      | 6.014    | 0.305                     | 19    | DB02282      | 6.048    | 0.436                     |
| 6         | DB00841      | 5.983    | 0.161                     | 20    | DB02359      | 6.165    | 0.449                     |
| 7         | DB00842      | 5.97     | 0.314                     | 21    | DB02375      | 7.08     | 0.349                     |
| 8         | DB00905      | 6.032    | 0.239                     | 22    | DB02500      | 5.954    | 0.245                     |
| 9         | DB01094      | 7.065    | 0.327                     | 23    | DB02568      | 5.97     | 0.315                     |
| 10        | DB01182      | 6.174    | 0.238                     | 24    | DB02733      | 6.965    | 0.461                     |
| 11        | DB01250      | 6.19     | 0.173                     | 25    | DB02754      | 6.219    | 0.445                     |
| 12        | DB01438      | 5.977    | 0.157                     | 26    | DB02830      | 6.5      | 0.387                     |
| 13        | DB01558      | 6.048    | 0.363                     | 27    | DB02898      | 7.01     | 0.313                     |
| 28        | DB02915      | 6.588    | 0.336                     | 44    | DB03735      | 6.496    | 0.387                     |
| 29        | DB02933      | 6.084    | 0.429                     | 45    | DB03763      | 6.034    | 0.324                     |
| 30        | DB02947      | 6.207    | 0.428                     | 46    | DB03804      | 5.952    | 0.426                     |
| 31        | DB02984      | 5.958    | 0.334                     | 47    | DB03809      | 6.164    | 0.43                      |
| 32        | DB02985      | 6.039    | 0.226                     | 48    | DB03878      | 6.043    | 0.363                     |
| 33        | DB03074      | 7.01     | 0.273                     | 49    | DB03881      | 7.084    | 0.475                     |
| 34        | DB03172      | 6.17     | 0.412                     | 50    | DB03899      | 6.273    | 0.422                     |
| 35        | DB03216      | 6.877    | 0.383                     | 51    | DB03916      | 6.947    | 0.345                     |
| 36        | DB03267      | 6.253    | 0.462                     | 52    | DB03921      | 6.571    | 0.318                     |
| 37        | DB03285      | 6.059    | 0.177                     | 53    | DB03980      | 6.664    | 0.376                     |
| 38        | DB03312      | 5.959    | 0.385                     | 54    | DB04004      | 6.161    | 0.334                     |
| 39        | DB03365      | 6.049    | 0.322                     | 55    | DB04030      | 6.515    | 0.468                     |
| 40        | DB03467      | 7.065    | 0.295                     | 56    | DB04054      | 5.984    | 0.472                     |
| 41        | DB03496      | 7.108    | 0.48                      | 57    | DB04101      | 6.01     | 0.293                     |
| 42        | DB03693      | 6.252    | 0.265                     | 58    | DB04196      | 5.964    | 0.343                     |
| 43        | DB03716      | 6.075    | 0.424                     | 59    | DB04216      | 7.102    | 0.348                     |
| 60        | DB04239      | 6.18     | 0.338                     | 76    | DB05575      | 6.027    | 0.363                     |
| 61        | DB04254      | 5.994    | 0.475                     | 77    | DB06152      | 6.594    | 0.19                      |
| 62        | DB04274      | 7.09     | 0.285                     | 78    | DB06198      | 5.961    | 0.362                     |
| 63        | DB04338      | 7.005    | 0.401                     | 79    | DB06397      | 6.074    | 0.204                     |
| 64        | DB04357      | 5.966    | 0.343                     | 80    | DB06485      | 6.793    | 0.32                      |
| 65        | DB04407      | 5.988    | 0.339                     | 81    | DB06589      | 5.972    | 0.445                     |
| 66        | DB04442      | 6.198    | 0.293                     | 82    | DB06609      | 7.098    | 0.343                     |
| 67        | DB04463      | 7.098    | 0.402                     | 83    | DB06619      | 6.783    | 0.398                     |
| 68        | DB04546      | 7.098    | 0.398                     | 84    | DB06649      | 6.859    | 0.183                     |

|     |         |       |       |     |         |       |       |
|-----|---------|-------|-------|-----|---------|-------|-------|
| 69  | DB04583 | 5.996 | 0.198 | 85  | DB06732 | 6.855 | 0.252 |
| 70  | DB04662 | 6.955 | 0.417 | 86  | DB06814 | 6.354 | 0.231 |
| 71  | DB04707 | 7.066 | 0.301 | 87  | DB06837 | 5.957 | 0.412 |
| 72  | DB04751 | 6.955 | 0.432 | 88  | DB06852 | 6.589 | 0.432 |
| 73  | DB04764 | 6.48  | 0.332 | 89  | DB06915 | 7.085 | 0.094 |
| 74  | DB04809 | 6.506 | 0.226 | 90  | DB06977 | 6.02  | 0.367 |
| 75  | DB04961 | 6.448 | 0.299 | 91  | DB07000 | 6.124 | 0.435 |
| 92  | DB07008 | 7.098 | 0.298 | 108 | DB07335 | 7.098 | 0.401 |
| 93  | DB07009 | 6.878 | 0.327 | 109 | DB07352 | 7.085 | 0.29  |
| 94  | DB07119 | 5.992 | 0.141 | 110 | DB07362 | 6.894 | 0.424 |
| 95  | DB07132 | 6.231 | 0.427 | 111 | DB07364 | 6.025 | 0.379 |
| 96  | DB07158 | 6.233 | 0.347 | 112 | DB07379 | 6.962 | 0.441 |
| 97  | DB07163 | 5.95  | 0.433 | 113 | DB07382 | 6.071 | 0.4   |
| 98  | DB07173 | 6.149 | 0.445 | 114 | DB07426 | 6.243 | 0.237 |
| 99  | DB07175 | 6.326 | 0.332 | 115 | DB07435 | 5.958 | 0.255 |
| 100 | DB07194 | 5.974 | 0.418 | 116 | DB07444 | 6.538 | 0.381 |
| 101 | DB07202 | 6.706 | 0.425 | 117 | DB07474 | 6.038 | 0.447 |
| 102 | DB07248 | 6.268 | 0.413 | 118 | DB07524 | 7.098 | 0.206 |
| 103 | DB07253 | 6.425 | 0.383 | 119 | DB07525 | 6.98  | 0.237 |
| 104 | DB07268 | 6.253 | 0.292 | 120 | DB07545 | 6.166 | 0.32  |
| 105 | DB07284 | 6.881 | 0.231 | 121 | DB07606 | 7.099 | 0.502 |
| 106 | DB07303 | 6.001 | 0.272 | 122 | DB07618 | 6.045 | 0.51  |
| 107 | DB07333 | 6.028 | 0.404 | 123 | DB07648 | 6.105 | 0.402 |
| 124 | DB07686 | 7.096 | 0.379 | 140 | DB08026 | 6.584 | 0.351 |
| 125 | DB07698 | 6.097 | 0.371 | 141 | DB08049 | 7.098 | 0.3   |
| 126 | DB07715 | 5.959 | 0.261 | 142 | DB08052 | 7.098 | 0.451 |
| 127 | DB07766 | 5.961 | 0.459 | 143 | DB08054 | 5.992 | 0.416 |
| 128 | DB07789 | 6.082 | 0.451 | 144 | DB08070 | 6.242 | 0.178 |
| 129 | DB07795 | 7.095 | 0.325 | 145 | DB08073 | 5.991 | 0.393 |
| 130 | DB07812 | 6.08  | 0.387 | 146 | DB08114 | 6.598 | 0.149 |
| 131 | DB07829 | 7.086 | 0.213 | 147 | DB08130 | 6.048 | 0.377 |
| 132 | DB07854 | 7.012 | 0.27  | 148 | DB08136 | 6.937 | 0.282 |
| 133 | DB07926 | 6.01  | 0.31  | 149 | DB08178 | 7.025 | 0.345 |
| 134 | DB07942 | 7.093 | 0.24  | 150 | DB08182 | 6.974 | 0.362 |
| 135 | DB07981 | 6.054 | 0.484 | 151 | DB08191 | 6.473 | 0.265 |
| 136 | DB07991 | 6.021 | 0.39  | 152 | DB08208 | 5.97  | 0.302 |
| 137 | DB07993 | 6.508 | 0.258 | 153 | DB08218 | 6.342 | 0.342 |
| 138 | DB07997 | 7.085 | 0.215 | 154 | DB08230 | 7.095 | 0.309 |
| 139 | DB08004 | 6.017 | 0.393 | 155 | DB08248 | 7.01  | 0.375 |
| 156 | DB08251 | 6.005 | 0.33  | 172 | DB08532 | 7.098 | 0.353 |
| 157 | DB08349 | 6.144 | 0.526 | 173 | DB08557 | 6.882 | 0.493 |
| 158 | DB08350 | 6.156 | 0.382 | 174 | DB08562 | 6.513 | 0.162 |
| 159 | DB08353 | 6.052 | 0.408 | 175 | DB08568 | 5.993 | 0.335 |
| 160 | DB08378 | 6.515 | 0.202 | 176 | DB08583 | 6.235 | 0.423 |
| 161 | DB08395 | 5.992 | 0.477 | 177 | DB08660 | 5.947 | 0.258 |
| 162 | DB08432 | 5.96  | 0.376 | 178 | DB08661 | 5.958 | 0.391 |
| 163 | DB08436 | 6.272 | 0.453 | 179 | DB08673 | 6.18  | 0.234 |
| 164 | DB08442 | 6.226 | 0.345 | 180 | DB08694 | 6.156 | 0.458 |
| 165 | DB08462 | 6.273 | 0.3   | 181 | DB08893 | 6.161 | 0.26  |
| 166 | DB08466 | 6.579 | 0.1   | 182 | DB11259 | 7.09  | 0.321 |
| 167 | DB08470 | 6.975 | 0.153 | 183 | DB11336 | 7.008 | 0.262 |
| 168 | DB08513 | 6.035 | 0.337 | 184 | DB11337 | 7.008 | 0.233 |
| 169 | DB08514 | 6.229 | 0.309 | 185 | DB11645 | 6.126 | 0.359 |
| 170 | DB08517 | 7.065 | 0.3   | 186 | DB11656 | 6.992 | 0.366 |
| 171 | DB08527 | 5.964 | 0.412 | 187 | DB11665 | 5.98  | 0.48  |
| 188 | DB11909 | 6.433 | 0.501 | 204 | DB12855 | 6.386 | 0.309 |
| 189 | DB11982 | 6.644 | 0.436 | 205 | DB12894 | 7.147 | 0.369 |
| 190 | DB12028 | 7.095 | 0.355 | 206 | DB12919 | 6.044 | 0.367 |
| 191 | DB12039 | 6.532 | 0.315 | 207 | DB12927 | 6.414 | 0.409 |
| 192 | DB12156 | 6.469 | 0.404 | 208 | DB12937 | 7.087 | 0.383 |

|     |         |       |       |     |         |       |       |
|-----|---------|-------|-------|-----|---------|-------|-------|
| 193 | DB12353 | 7.098 | 0.393 | 209 | DB12957 | 7.07  | 0.361 |
| 194 | DB12383 | 6.018 | 0.376 | 210 | DB13203 | 6.066 | 0.448 |
| 195 | DB12432 | 5.969 | 0.351 | 211 | DB13757 | 6.152 | 0.234 |
| 196 | DB12433 | 6.084 | 0.375 | 212 | DB13837 | 5.964 | 0.4   |
| 197 | DB12438 | 7.098 | 0.354 | 213 | DB13983 | 7.085 | 0.384 |
| 198 | DB12450 | 6.089 | 0.158 | 214 | DB14008 | 7.085 | 0.332 |
| 199 | DB12531 | 7.087 | 0.373 | 215 | DB14028 | 5.965 | 0.281 |
| 200 | DB12566 | 6.961 | 0.387 | 216 | DB14086 | 6.546 | 0.315 |
| 201 | DB12672 | 6.986 | 0.435 | 217 | DB14109 | 6.888 | 0.247 |
| 202 | DB12746 | 6.496 | 0.298 | 218 | DB14122 | 6.047 | 0.206 |
| 203 | DB12848 | 5.978 | 0.405 | 219 | DB14127 | 6.212 | 0.249 |

Table S5. Interaction and pharmacokinetic evaluation of screened RET inhibitors.

| S. No | DrugBank ID | Interaction analysis         |                                               | Pharmacokinetic parameters |     |     |        |        |
|-------|-------------|------------------------------|-----------------------------------------------|----------------------------|-----|-----|--------|--------|
|       |             | Type of Interaction          | Interaction pattern                           | Stars                      | CNS | HOA | QLogS  | QlogBB |
| 1     | Pralsetinib | Hydrogen Bond                | NH ... ALA807<br>ALA807 ... N<br>SER811 ... N | 0                          | −2  | 2   | −6.287 | −0.469 |
| 2     | DB07194     | Hydrogen Bond                | NH ... ASP892<br>OH ... ASN878                | 0                          | −2  | 3   | −6.189 | −1.251 |
| 3     | DB03496     | Hydrogen Bond                | OH ... ARG878<br>ALA807 ... O                 | 0                          | 1   | 3   | −3.972 | −0.521 |
| 4     | DB11982     | Salt Bridge<br>Hydrogen Bond | ASP892 ... N <sup>+</sup> H<br>OH ... ARG878  | 0                          | −2  | 3   | −4.901 | −1.18  |

Table S6. Mutational analysis of predicted compounds using docking and MM-GBSA studies.

| Glide XP Gscore (kcal/mol) |             |        |        |        |        |        |        |        |        |        |        |        |
|----------------------------|-------------|--------|--------|--------|--------|--------|--------|--------|--------|--------|--------|--------|
| S. No                      | DrugBank ID | G810C  | G810R  | G810S  | G810V  | M918T  | V738A  | V804E  | V804L  | V804M  | Y806C  | Y806N  |
| Reference                  | Pralsetinib | −3.69  | −3.356 | −6.69  | −5.684 | −4.85  | −4.555 | −6.682 | −8.067 | −7.625 | −5.764 | −4.81  |
| 1                          | DB07194     | −6.548 | −6.267 | −5.918 | −6.895 | −8.196 | −7.725 | −7.493 | −5.773 | −8.503 | −7.917 | −9.133 |
| 2                          | DB03496     | ND     | −10.18 | ND     | ND     | −7.818 | −5.55  | ND     | −5.967 | −4.001 | −7.955 | −7.553 |
| 3                          | DB11982     | −6.363 | −6.773 | −8.536 | −4.374 | −7.56  | −4.877 | −5.138 | −5.44  | −9.157 | −7.945 | −8.494 |

  

| dG Bind (kcal/mol) |             |        |        |        |        |        |        |        |        |         |        |        |
|--------------------|-------------|--------|--------|--------|--------|--------|--------|--------|--------|---------|--------|--------|
| S. No              | DrugBank ID | G810C  | G810R  | G810S  | G810V  | M918T  | V738A  | V804E  | V804L  | V804M   | Y806C  | Y806N  |
| Reference          | Pralsetinib | −73    | −77.15 | −83.23 | −61.59 | −50.29 | −67.41 | −92.35 | −83.72 | −94.27  | −77.27 | −68.39 |
| 1                  | DB07194     | −79.58 | −63.42 | −65.68 | −80.54 | −74.11 | −46.27 | −77.21 | −78.33 | −60.63  | −76.22 | −63.32 |
| 2                  | DB03496     | ND     | −80.79 | ND     | ND     | −87.16 | −66.54 | ND     | −61.39 | −54.001 | −61.69 | −58.19 |
| 3                  | DB11982     | −67.74 | −69.5  | −68.34 | −64.01 | −47.06 | −49.53 | −69.96 | −70.25 | −66.99  | −65.77 | −67.71 |

ND: Compound got eliminated during docking analysis.

Table S7. Examination of cell viability at different drug concentrations (μM/ml) against LC-2/ad cell line.

| Pralsetinib |         |        |                        |        |       |       | DB07194 |        |                        |       |       |        |
|-------------|---------|--------|------------------------|--------|-------|-------|---------|--------|------------------------|-------|-------|--------|
| S. No       | Control | 6.25   | 12.5                   | 25     | 50    | 100   | Control | 6.25   | 12.5                   | 25    | 50    | 100    |
| 1           | 100     | 86.18  | 66.74                  | 41.14  | 23.31 | 10.61 | 100     | 79.22  | 66.74                  | 20.59 | 12.48 | 8.55   |
| 2           | 100     | 84.5   | 69.53                  | 39.59  | 24.95 | 9.6   | 100     | 83.5   | 68.5                   | 18.9  | 12.23 | 8.667  |
| 3           | 100     | 85.8   | 67.55                  | 42.69  | 22.1  | 11.3  | 100     | 81.96  | 64.9                   | 21.3  | 13.05 | 9.63   |
| Sum         | 300     | 256.48 | 203.82                 | 123.42 | 70.36 | 31.51 | 300     | 244.68 | 200.14                 | 60.79 | 37.76 | 26.853 |
| Average     | 100     | 85.49  | 67.94                  | 41.14  | 23.45 | 10.50 | 100     | 81.56  | 66.71                  | 20.26 | 12.58 | 8.95   |
| Variance    | 0       | 0.77   | 2.05                   | 2.40   | 2.04  | 0.73  | 0       | 4.69   | 3.24                   | 1.52  | 0.17  | 0.34   |
| P-value     |         |        | $5.47 \times 10^{-18}$ |        |       |       |         |        | $5.95 \times 10^{-18}$ |       |       |        |

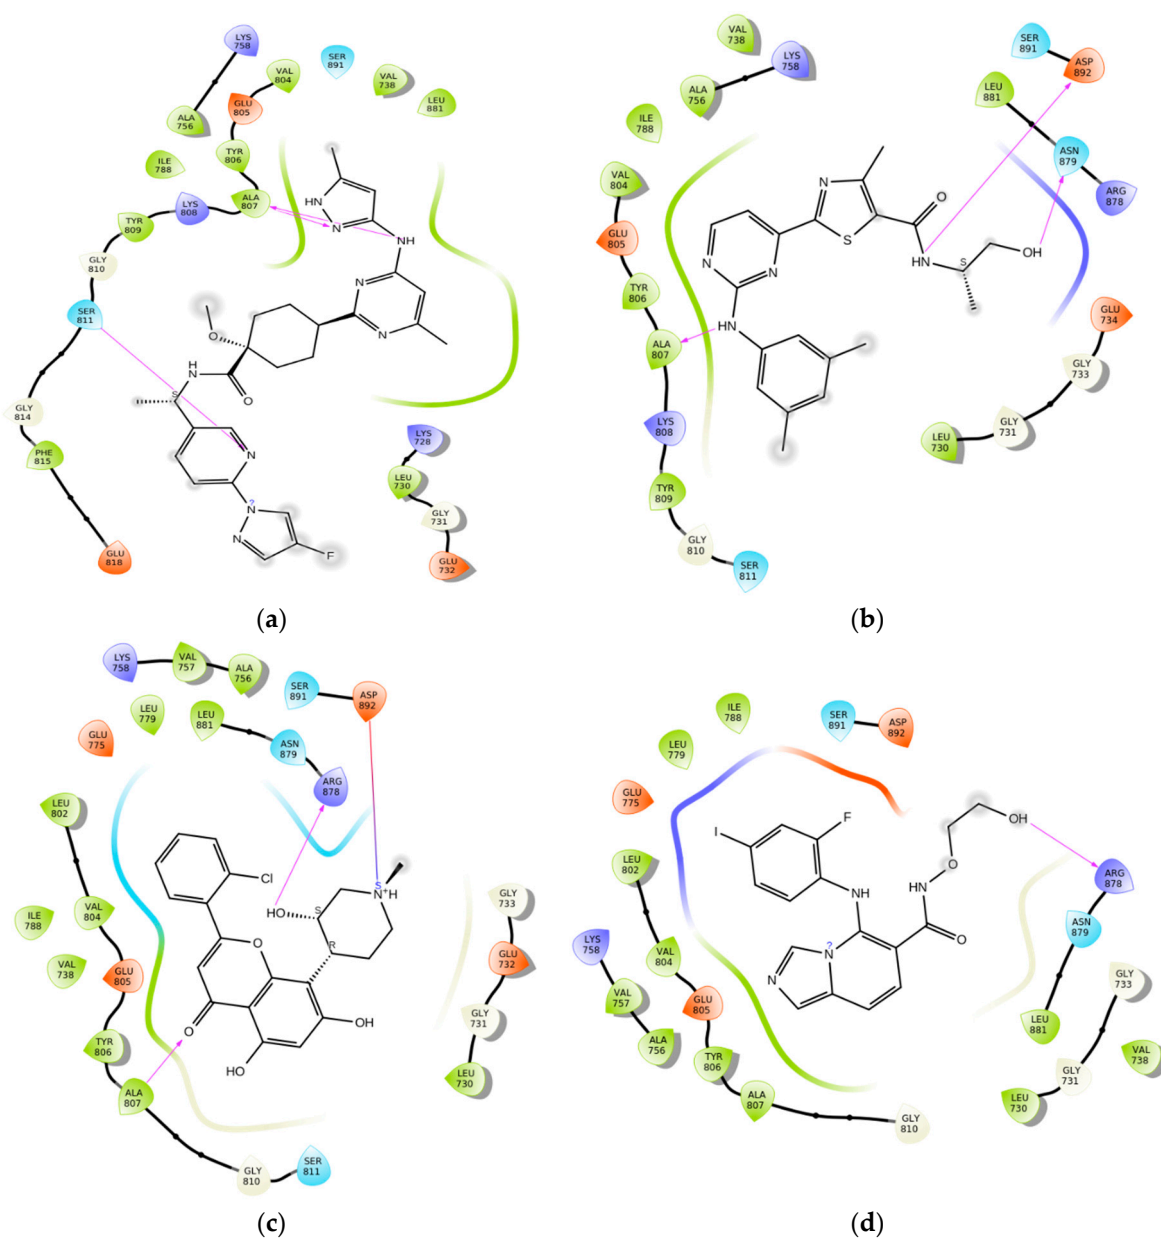

**Figure S1.** Binding mode analysis of reference compound (a) Pralsetinib, (b) DB07194, (c) DB03496 and (d) DB11982 with the target RET protein.

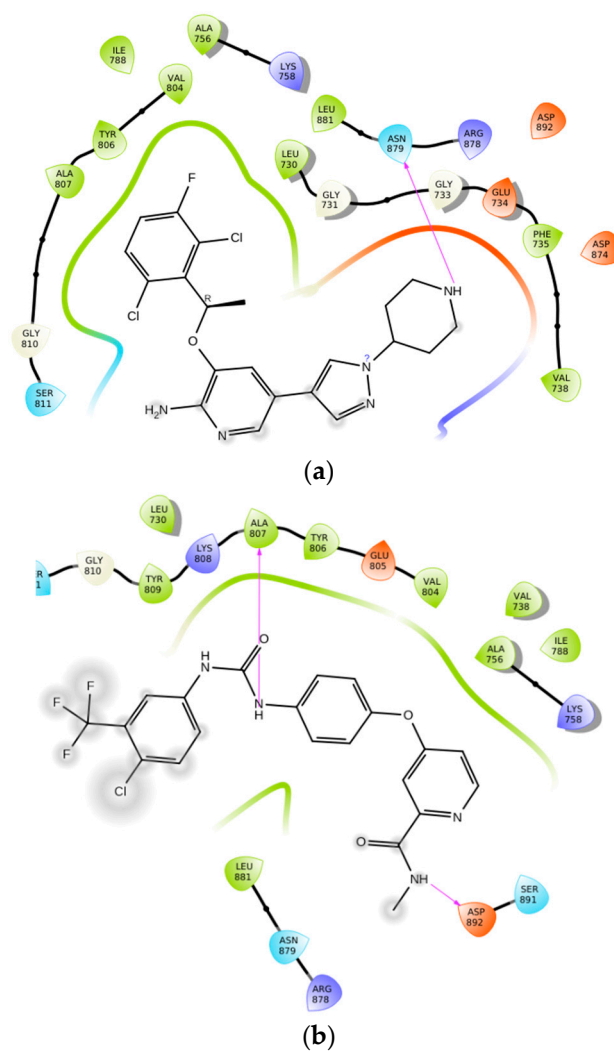

**Figure S2.** Comparative interaction analysis of (a) crizotinib and (b) Sorafenib with RET protein.
